# Supplementary material for: Effect of Bis (2-Aminoethyl) Adipamide/Adipic Acid Segment on Polyamide 6: Crystallization Kinetics Study
Source: MDPI journal article supplement (doi:10.3390/polym12051067), 2020-05-06
Supplement: s1 [file s1]

# Effect of Bis (2-Aminoethyl) Adipamide/Adipic Acid Segment on Polyamide 6: Crystallization Kinetics Study

Yu-Hao Chen, Palraj Ranganathan, Chin-Wen Chen, Yi-Huan Lee and Syang-Peng Rwei

## S1. Synthesis of PA6(BAEA/AA) Copolyamides

The preparing method of bis(2-aminoethyl)adipamide (BAEA) diamine and its organic salt (BAEA/AA salt) has been disclosed in previous work [1–3]. Weighed quantities of  $\epsilon$ -caprolactam, BAEA/AA salt, DI water (5.0 wt%), and orthophosphoric acid (0.2 wt%) were added to a 2 L autoclave with a stirrer and vacuum system. After the oxygen in the autoclave had been removed by repeated purging with pure nitrogen under pressure, the autoclave was heated to 200 °C for 1 h under nitrogen at a pressure of 2 kg cm<sup>-2</sup>, and further heated to 250 °C for 2.0 to 2.5 h in the flowing nitrogen while the pressure was reduced to atmospheric pressure. Low-pressure conditions were maintained until the required melting viscosity was reached. A PA6 (BAEA/AA) was then removed from the bottom duct lid of the 2L reactor and quenched in a water bath. It was subsequently purified by hot water extraction and dried copolyamide particles analysis. As shown in Figure S1, <sup>1</sup>H NMR (CF<sub>3</sub>COOD, 300 MHz):  $\delta$ 3.83 (CH<sub>2</sub>NHCO from BAEA/AA segment),  $\delta$ 3.63 (CH<sub>2</sub>NHCO from PA6 segment),  $\delta$ 2.80 (NHCOCH<sub>2</sub> from PA6 segment),  $\delta$ 2.73 (NHCOCH<sub>2</sub> from BAEA/AA segment),  $\delta$ 1.95–1.57 (CH<sub>2</sub>). FT-IR: 3299 (N-H stretching), 2932 (asymmetric stretching of CH<sub>2</sub>), 2854 (symmetric stretching of CH<sub>2</sub>), 1635 (amide I), 1536 (amide II), and 1262 (amide III) cm<sup>-1</sup>.

**Table S1.** Composition and relative viscosity of the PA6 and PA6/(BAEA/AA) copolyamides.

| Sample | PA6/(BAEA/AA)/mole% |                               | Relative Viscosity ( $\eta_r$ ) <sup>b</sup> |
|--------|---------------------|-------------------------------|----------------------------------------------|
|        | Feed Ratio          | Calculated Ratio <sup>a</sup> |                                              |
| PA6    | 100/0               | 100/0                         | 2.74                                         |
| PA6-5  | 95/5                | 95.9/4.1                      | 2.50                                         |
| PA6-10 | 90/10               | 89.5/9.5                      | 2.46                                         |
| PA6-15 | 85/15               | 85.0/15.0                     | 2.29                                         |

<sup>a</sup> Determined by <sup>1</sup>H NMR in d-TFA solvent based on the integration. <sup>b</sup> Relative viscosity ( $\eta_r$ ) measured using an Ubbelohde viscometer in accordance with ASTM-D789. C = 0.1 g dL<sup>-1</sup> in formic acid (90%) solution.

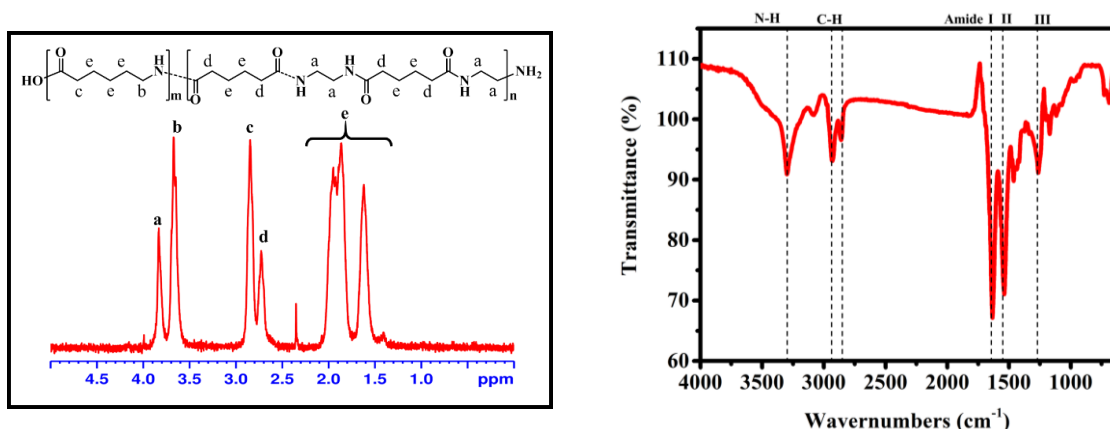

**Figure S1.** <sup>1</sup>H NMR (left) and FT-IR (right) spectra of PA6-10 (CF<sub>3</sub>COOD, 300 MHz).

**Table S2.** Thermal properties of PA6 and PA6(BAEA/AA) copolyamides at non-isothermal conditions.

| Samples | $T_o^a$<br>°C | $T_p^a$<br>°C | $T_f^a$<br>°C | $\Delta H_c^a$<br>J g <sup>-1</sup> | $T_m^a$<br>°C | $\Delta H_m^a$<br>J g <sup>-1</sup> | $X_c$ % <sup>b</sup><br>% | $T_g^c$<br>°C |
|---------|---------------|---------------|---------------|-------------------------------------|---------------|-------------------------------------|---------------------------|---------------|
| PA6     | 192           | 188.9         | 185           | 55.2                                | 219.6         | 47.3                                | 24.9                      | 61.3          |
| PA6-5   | 148.8         | 143.5         | 138.2         | 35.3                                | 186.0         | 29.9                                | 15.7                      | 44.1          |
| PA6-10  | 115.8         | 104.8         | 93.6          | 31.4                                | 155.8         | 23.1                                | 12.2                      | 40.3          |
| PA6-15  | 151.6         | 144.9         | 136.4         | 25.2                                | 190.5         | 20.1                                | 10.6                      | 41.6          |

<sup>a</sup> the thermal properties are ascertained from the DSC analysis at the non-isothermal condition at a cooling rate of 10 °C min<sup>-1</sup>, where the  $T_o$ ,  $T_p$ , and  $T_f$  represented the onset, peak, and finish crystallization temperature. <sup>b</sup> the  $X_c$  is crystallinity and calculated from  $\Delta H_m/\Delta H_m^0$ , where  $\Delta H_m^0$  is the fusion enthalpy of 100% crystalline PA6, which is 190 J g<sup>-1</sup>. <sup>c</sup> the  $T_g$  is measured by the dynamic mechanical analyzer (DMA, Tech Max DMS 6100, Tokyo, Japan), as shown in Figure S2.

**Table S3.** Thermal properties and the calculated crystallization degrees of PA6 and PA6(BAEA/AA) copolyamides.

| Samples | $T_c$<br>°C | $T_{m-I}^a$<br>°C | $T_{m-II}^a$<br>°C | $T_{m-III}^a$<br>°C | $\Delta H_m^a$<br>J g <sup>-1</sup> | $X_c$ %<br>% |
|---------|-------------|-------------------|--------------------|---------------------|-------------------------------------|--------------|
| PA6     | 180         | 212.8             | N/A                | 225.2               | 44.6                                | 23.5         |
|         | 185         | 214.8             | N/A                | 225.1               | 41.6                                | 21.9         |
|         | 190         | 217.2             | N/A                | 224.8               | 38.1                                | 20.1         |
|         | 195         | 222.7             | N/A                | N/A                 | 34.6                                | 18.2         |
|         | 200         | 223.6             | N/A                | N/A                 | 27.7                                | 14.6         |
| PA6-5   | 135         | 169.8             | N/A                | 187.9               | 27.3                                | 14.4         |
|         | 140         | 172.9             | N/A                | 188.3               | 26.3                                | 13.8         |
|         | 145         | 176.4             | N/A                | 188.8               | 21.4                                | 11.3         |
|         | 150         | 179.9             | N/A                | 189.3               | 19.9                                | 10.5         |
|         | 155         | 184.2             | N/A                | N/A                 | 11.5                                | 6.1          |
| PA6-10  | 95          | 141.4             | 164.3              | 180.4               | 29.5                                | 15.5         |
|         | 100         | 143.2             | 165.0              | 180.5               | 28                                  | 14.7         |
|         | 105         | 145.7             | 165.4              | 179.6               | 27.1                                | 14.3         |
|         | 110         | 148.9             | 165.9              | 179.3               | 25.3                                | 13.3         |
|         | 115         | 152.4             | 166.8              | 178.9               | 22.4                                | 11.8         |
| PA6-15  | 135         | N/A               | 191.7              | N/A                 | 21.4                                | 11.3         |
|         | 140         | N/A               | 192.1              | N/A                 | 19.4                                | 10.2         |
|         | 145         | N/A               | 192.5              | N/A                 | 17.8                                | 9.4          |
|         | 150         | N/A               | 192.9              | N/A                 | 15.4                                | 8.1          |
|         | 155         | N/A               | 193.3              | N/A                 | 12.3                                | 6.5          |

<sup>a</sup> The thermal properties are ascertained from the DSC analysis at the different isothermal conditions.

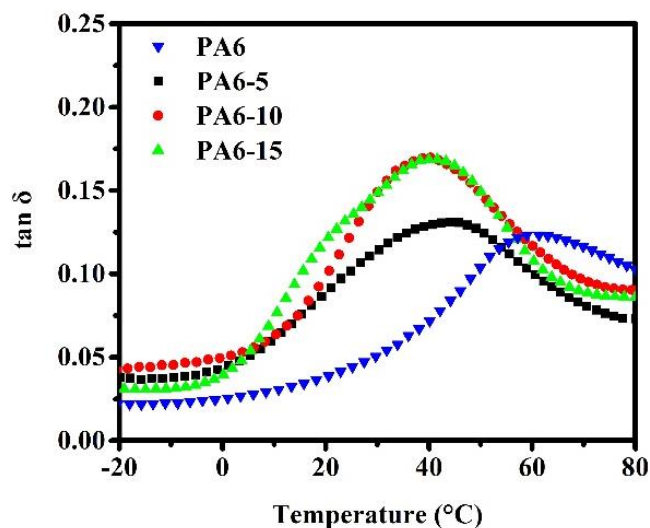

Figure S2. The  $\tan \delta$  curves of PA6 and PA6(BAEA/AA) copolyamides.

## S2. Isothermal Crystallization Kinetics

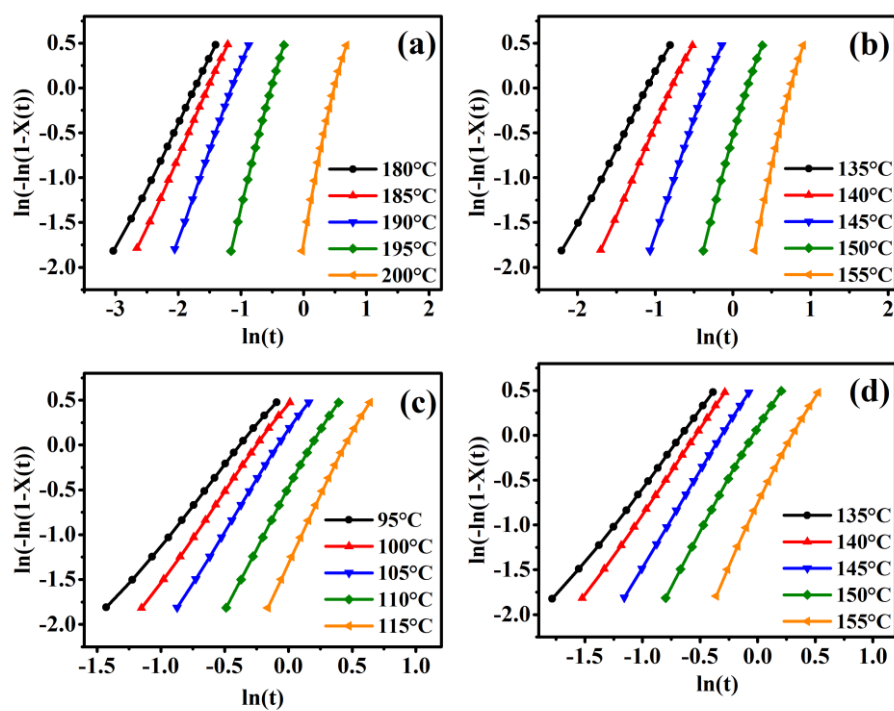

Figure S3. The plots of  $\ln[-\ln(1-X(t))]$  versus  $\ln(t)$  via the Avrami equation during the different isothermal processes for the (a) pure PA6, (b) PA6-5, (c) PA6-10, and (d) PA6-15.

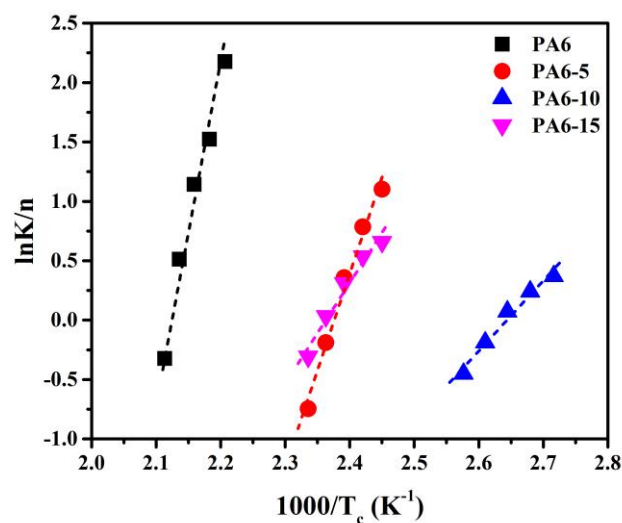

**Figure S4.** The crystallization activation energy ( $\Delta E_a$ ) PA6 for copolyamides at different contents of BAEA/AA via the Arrhenius method.

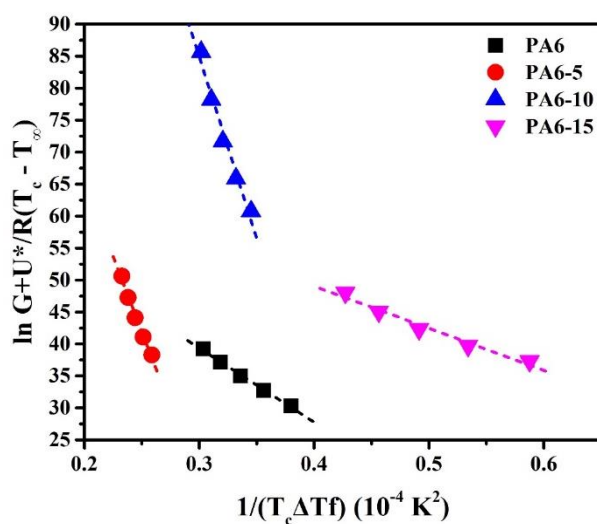

**Figure S5.** Lauritzen–Hoffman plot for PA6 copolyamides at different contents of BAEA/AA.

## References

- [1] S.-P. Rwei, T.-F. Wei, Y.-H. Chen, Modifying agent, polyamide copolymer synthesized using modifying agent and method for preparing polyamide copolymer, US20190040197, 2018. <https://patents.google.com/patent/US20190040197A1/en>.
- [2] C.-W. Chen, C.-W. Lin, Y.-H. Chen, T.-F. Wei, S.-P. Rwei, R. Sasikumar, The influence of 1,4-cyclohexanedicarboxylic acid on the thermal and mechanical properties of copolyamides, *Polym. Bull.* **2020**, *77*, 235–253. <https://doi.org/10.1007/s00289-019-02738-7>.
- [3] Chen, Y.-H.; Chen, C.-W.; Wei, T.-F.; Rwei, S.-P. Synthesis and characterization of low-temperature polyamide 6 (PA6) copolyamides used as hot melt adhesives and derived from the comonomer of novel aliphatic diamine bis(2-aminoethyl) adipamide and adipic acid. *Int. J. Adhes. Adhes.* **2020**, 102619, doi:10.1016/j.ijadhadh.2020.102619.
